# Supplementary material for: [C5H12N]CdCl3: an ABX3 perovskite-type semiconducting switchable dielectric phase transition material
Source: Royal Society of Chemistry journal article supplement (doi:10.1039/c7qi00301c), 2017-01-01
Supplement: c7qi00301c1.pdf [file c7qi00301c1.pdf]

## Supporting Information

### [C<sub>5</sub>H<sub>12</sub>N]CdCl<sub>3</sub>: An ABX<sub>3</sub> Perovskite-type Semiconducting Switchable Dielectric Phase Transition Material

Aurang Zeb,<sup>a,b</sup> Zhihua Sun,<sup>†a</sup> Tariq Khan,<sup>a,b</sup> Muhammad Adnan Asghar,<sup>a,b</sup> Zhenyue Wu,<sup>a,b</sup> Lina Li,<sup>a</sup> Chengmin Ji,<sup>a</sup> and Junhua Luo<sup>†a</sup>

<sup>a</sup>. State Key Laboratory of Structural Chemistry, Fujian Institute of Research on the Structure of Matter (FJIRSM), Chinese Academy of Sciences (CAS), Fuzhou, Fujian 350002, P. R. China

<sup>b</sup>. University of Chinese Academy of Sciences (UCAS), Beijing 100190, P. R. China

<sup>†</sup>Correspondence: [sunzhihua@fjirsm.ac.cn](mailto:sunzhihua@fjirsm.ac.cn) and [jhluo@fjirsm.ac.cn](mailto:jhluo@fjirsm.ac.cn)

#### Table of Contents:

**Figure S1.** Powder X-ray diffraction pattern of **MPCC**

**Figure S2.** IR spectrum of **MPCC**

**Table S1.** IR spectrum of **MPCC** displays characteristics peaks for stretching and bending vibrations

**Figure S3.** DSC curves of **MPCC** at different scanning rates (5 K/min, 10 K/min, and 15 K/min)

**Figure S4.** TGA spectrum of **MPCC**, showing its thermal stability

**Figure S5.** Symmetry breaking process in **MPCC** occurring from space group *Pnma* to *P2<sub>1</sub>/n*

**Figure S6.** Temperature-dependent cycle of dielectric constant of **MPCC** at 1 MHz

**Figure S7.** UV–vis diffuse reflectance spectroscopy result of **MPCC**

**Figure S8.** Temperature-dependent conductivity of **MPCC**, showing its semiconducting behaviour

**Table S2.** The SCXRD data and structure refinement details of **MPCC** at 280 K and 230 K

**Table S3.** Selected bond angles [°] for **MPCC** at 280 K and 230 K

**Table S4.** Selected bond lengths [Å] for **MPCC** at 280 K and 230 K

**Table S5.** Hydrogen-bond geometry (Å, deg) for the N–H⋯Cl at 280 K and 230 K in **MPCC**

**Calculation of 'ΔS' and 'N' For MPCC**

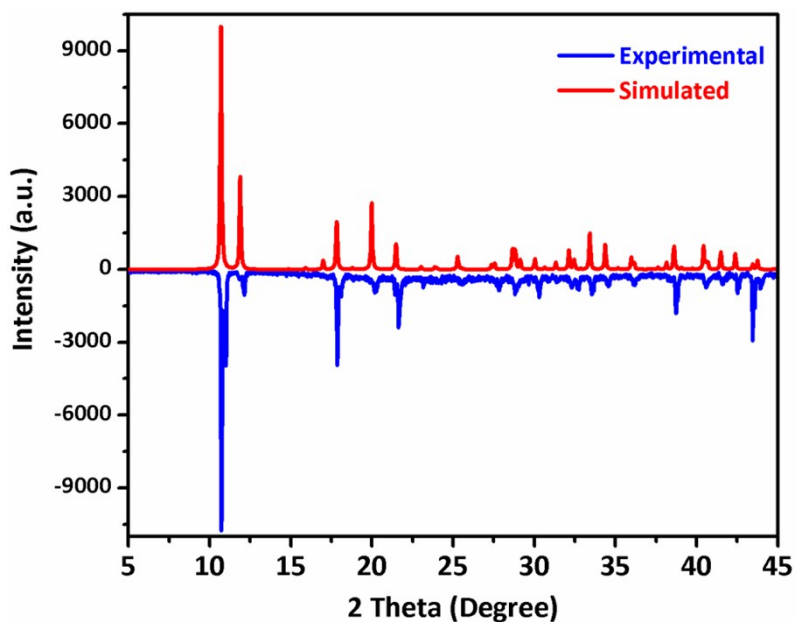

**Figure S1.** Experimental and simulated PXRD Patterns of **MPCC**, verifying the phase purity.

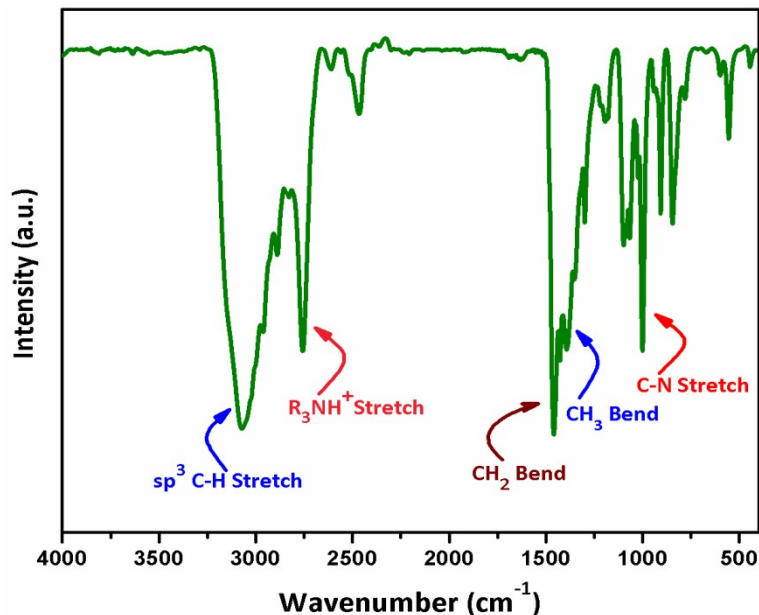

**Figure S2.** IR Spectrum of **MPCC**, verifying the phase purity.

**Table S1.** IR spectrum of **MPCC** displays characteristics peaks for stretching and bending vibrations

| Group                                                 | Stretching Vibration (cm <sup>-1</sup> ) |
|-------------------------------------------------------|------------------------------------------|
| sp <sup>3</sup> C-H                                   | 3070                                     |
| C-N                                                   | 995                                      |
| Tertiary amine salt (R <sub>3</sub> NH <sup>+</sup> ) | 2750                                     |
| Group                                                 | Bending Vibration (cm <sup>-1</sup> )    |
| Methyl (CH <sub>3</sub> -)                            | 1460                                     |
| Methylene (-CH <sub>2</sub> -)                        | 1390                                     |

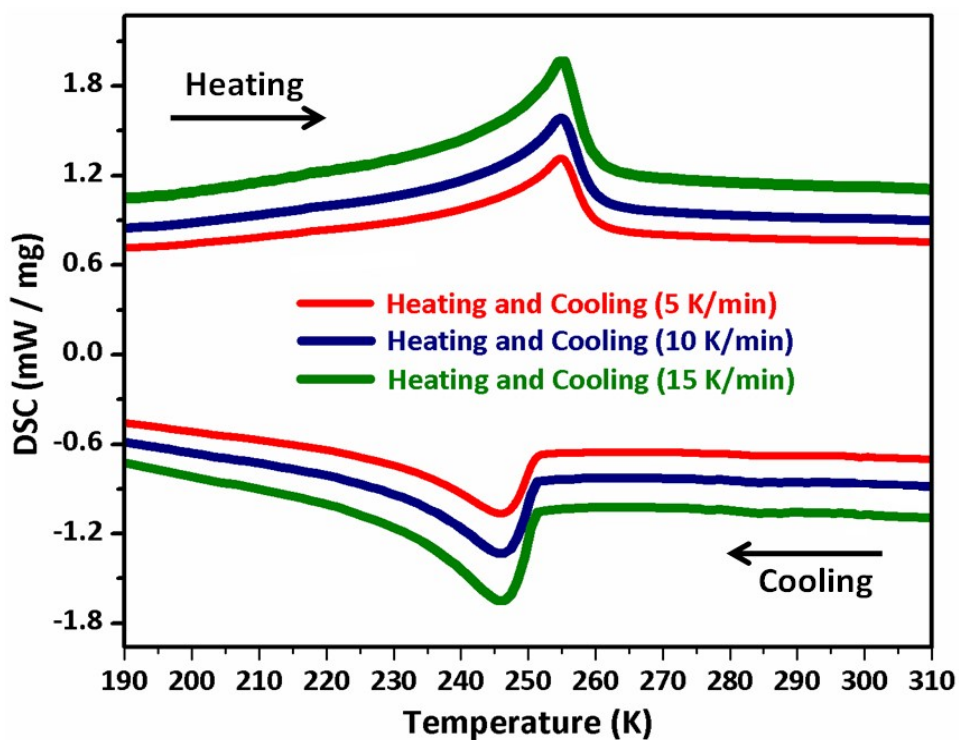

Figure S3. DSC curves of MPCC at different scanning rates (5 K/min, 10 K/min, and 15 K/min).

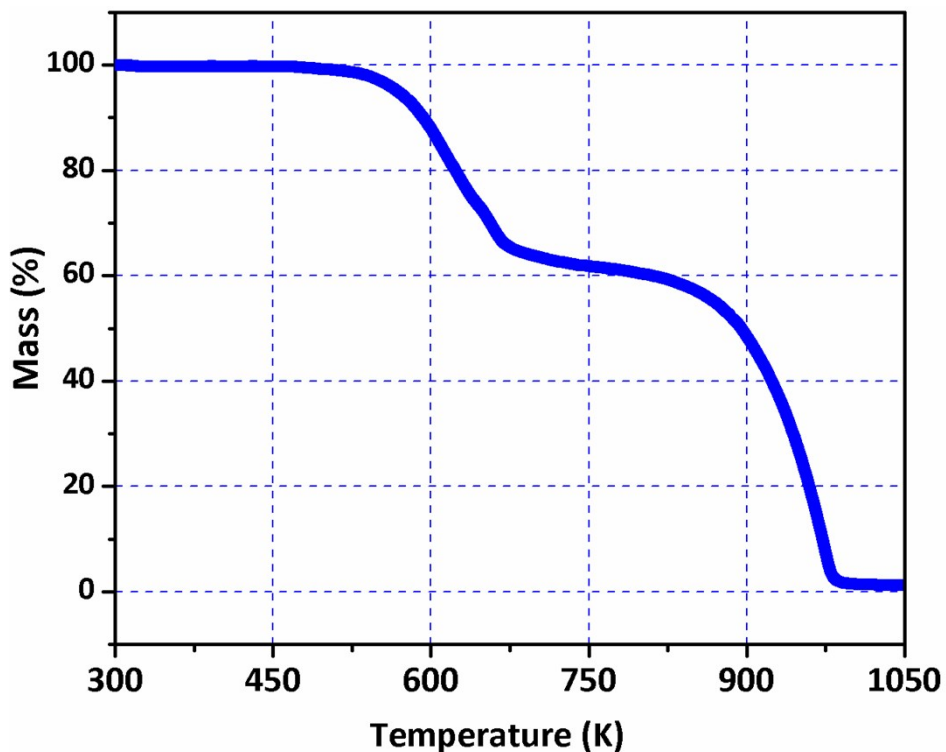

Figure S4. Thermo-Gravimetric Analysis (TGA) spectrum of MPCC, shows its high thermal stability.

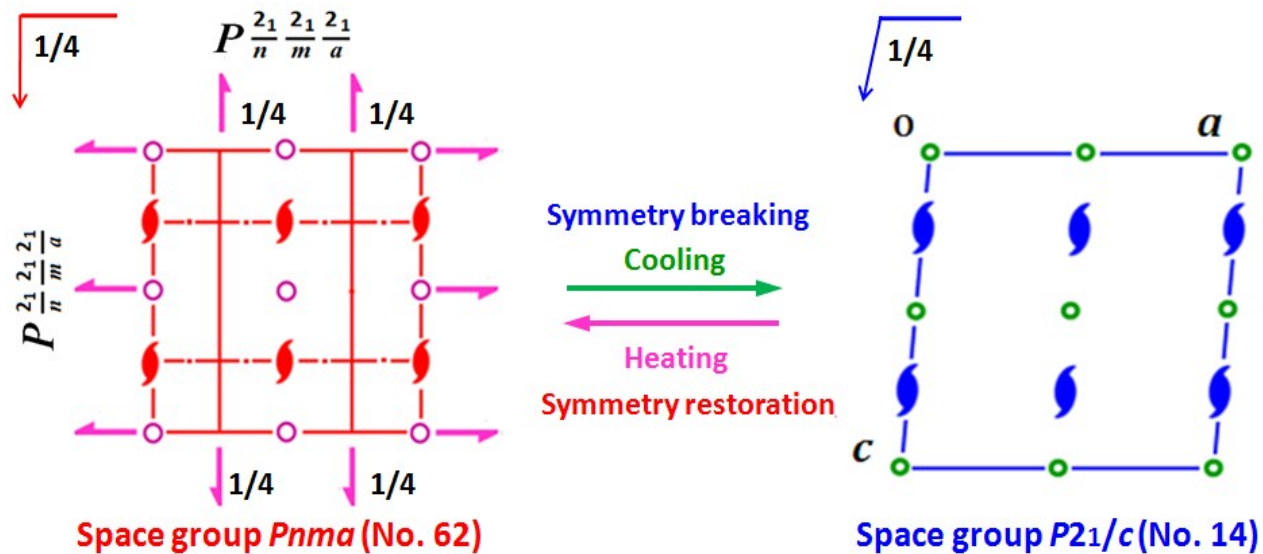

Figure S5. Symmetry breaking process in MPCC occurring from  $Pnma$  (HTP) to  $P2_1/n$  (LTP).

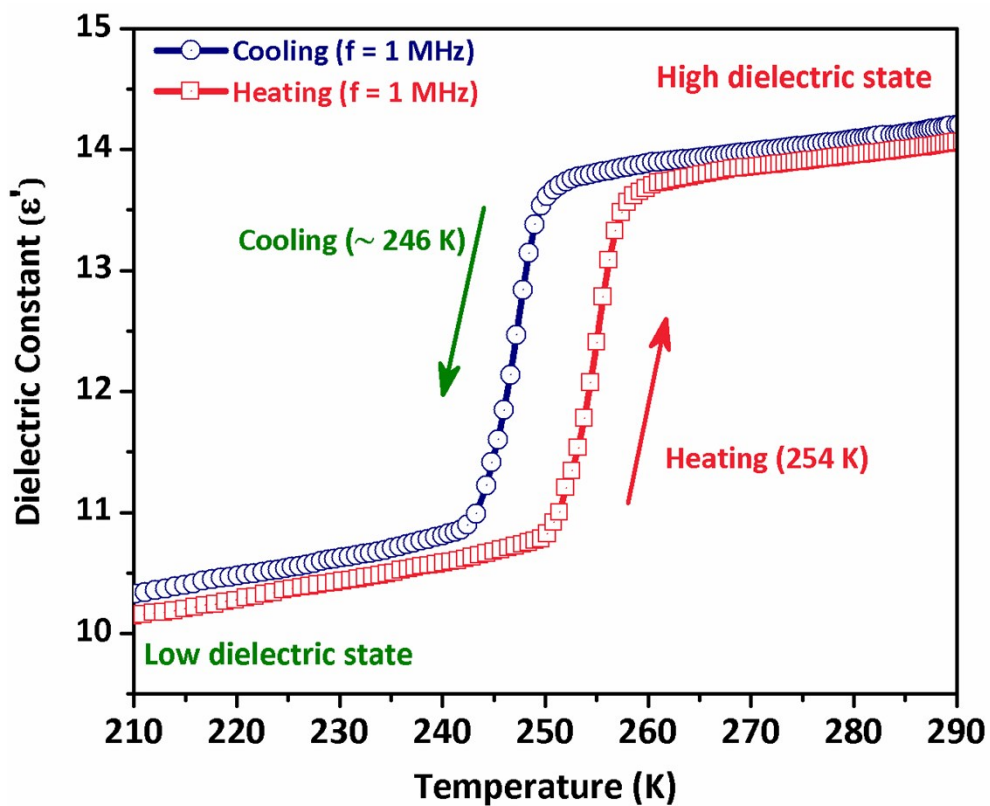

Figure S6. Temperature-dependent cycle of dielectric constant at 1 MHz for MPCC, displaying its switchable dielectric property.

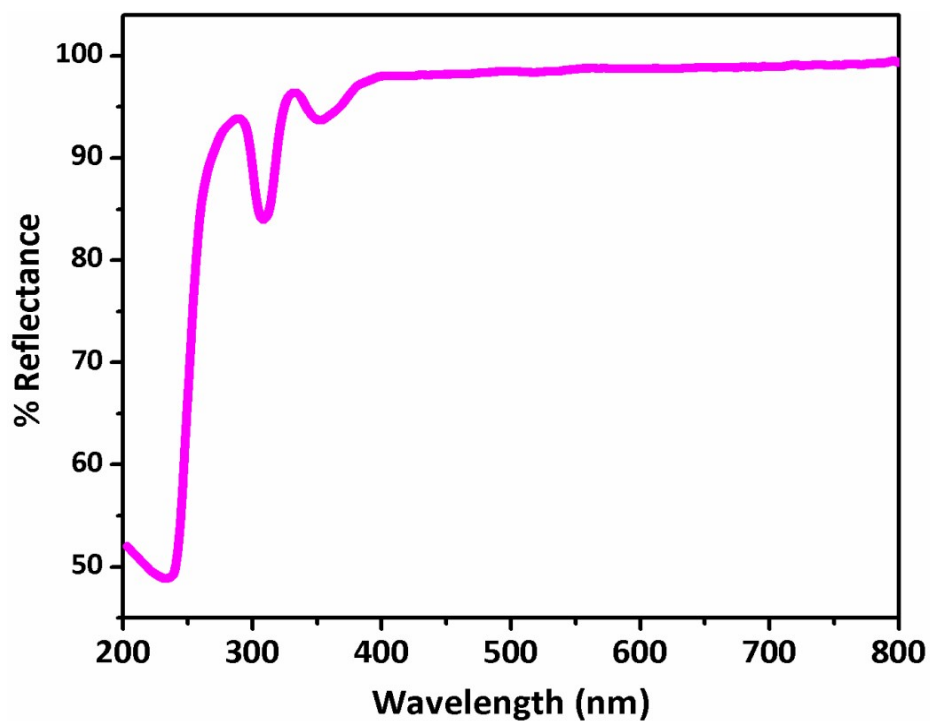

Figure S7. UV-vis diffuse reflectance spectroscopy result of MPCC.

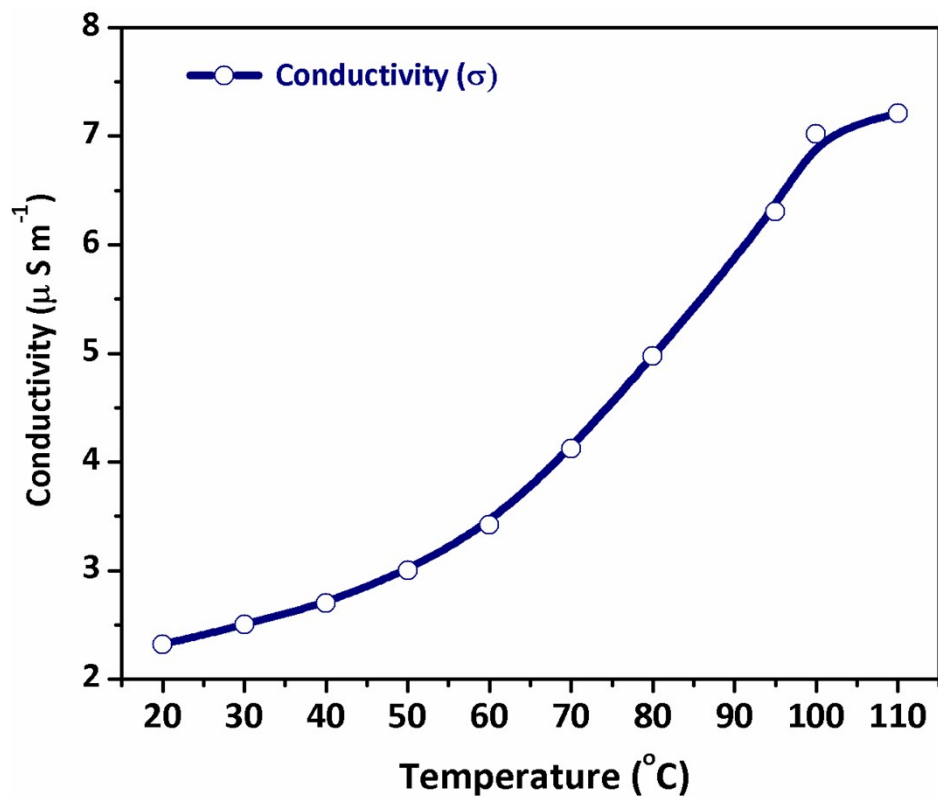

Figure S8. Temperature-dependent conductivity of MPCC, showing its semiconducting behaviour.

**Table S2.** The SCXRD data and structure refinement details of **MPCC** at 280 K and 230 K.

|                                                                          |                                                                                                                                      |                                                                                                                                              |
|--------------------------------------------------------------------------|--------------------------------------------------------------------------------------------------------------------------------------|----------------------------------------------------------------------------------------------------------------------------------------------|
| Temperature (K)                                                          | 280 K, Mo-K $\alpha$                                                                                                                 | 230 K, Cu-K $\alpha$                                                                                                                         |
| Sum formula                                                              | C <sub>5</sub> H <sub>12</sub> Cd Cl <sub>3</sub> N <sub>1</sub>                                                                     | C <sub>5</sub> H <sub>12</sub> Cd Cl <sub>3</sub> N <sub>1</sub>                                                                             |
| Moiety formula                                                           | C <sub>5</sub> H <sub>12</sub> N, Cd Cl <sub>3</sub>                                                                                 | C <sub>5</sub> H <sub>12</sub> N, Cd Cl <sub>3</sub>                                                                                         |
| Formula Weight                                                           | 304.91                                                                                                                               | 304.91                                                                                                                                       |
| Crystal system                                                           | Orthorhombic                                                                                                                         | Monoclinic                                                                                                                                   |
|                                                                          | <i>Pnma</i>                                                                                                                          | <i>P 2<sub>1</sub>/c</i>                                                                                                                     |
| Cell parameters                                                          | <i>a</i> = 14.8934 (10) Å<br><i>b</i> = 6.7188 (3) Å<br><i>c</i> = 9.9423 (5) Å<br>$\alpha$ = 90°<br>$\beta$ = 90°<br>$\gamma$ = 90° | <i>a</i> = 6.6875 (4) Å<br><i>b</i> = 10.0809 (5) Å<br><i>c</i> = 14.5347 (10) Å<br>$\alpha$ = 90°<br>$\beta$ = 92.298(5)°<br>$\gamma$ = 90° |
| Volume (Å <sup>3</sup> )                                                 | 994.88(9)                                                                                                                            | 979.08(10)                                                                                                                                   |
| Z                                                                        | 4                                                                                                                                    | 4                                                                                                                                            |
| $\rho_{\text{cal.}}$ (g/cm <sup>3</sup> )                                | 2.036                                                                                                                                | 2.069                                                                                                                                        |
| <i>F</i> (000)                                                           | 592.0                                                                                                                                | 592.0                                                                                                                                        |
| Theta range (°)                                                          | 3.9110-28.3620                                                                                                                       | 5.3250 - 72.5490                                                                                                                             |
| Limiting indices                                                         | -13<= <i>h</i> <=18,<br>-8<= <i>k</i> <=8,<br>-12<= <i>l</i> <=12                                                                    | -7<= <i>h</i> <=7,<br>-12<= <i>k</i> <=12,<br>-17<= <i>l</i> <=17                                                                            |
| Completeness                                                             | 99.8%                                                                                                                                | 98.8%                                                                                                                                        |
| GOF                                                                      | 1.043                                                                                                                                | 1.177                                                                                                                                        |
| <i>R</i> <sub>1</sub> [on $F_o^2$   <i>I</i> > 2 $\sigma$ ( <i>I</i> )]  | 0.0320 (849)                                                                                                                         | 0.0961 (1417)                                                                                                                                |
| <i>wR</i> <sub>2</sub> [on $F_o^2$   <i>I</i> > 2 $\sigma$ ( <i>I</i> )] | 0.0777 (1106)                                                                                                                        | 0.2680 (1699)                                                                                                                                |

$$\alpha R_1 = \Sigma [(F_o) - (F_c)] / \Sigma [F_o], wR_2 = [\Sigma (|F_o|^2 - |F_c|^2) / \Sigma |F_o|^2]^{1/2}$$

**Table S3.** Selected Bond Angles [°] for **MPCC** at 280 K and 230 K

| <b>T (K)</b>          | Atom- Atom- Atom                           | Angles [°] | Atom- Atom- Atom                           | Angles [°] |
|-----------------------|--------------------------------------------|------------|--------------------------------------------|------------|
| <b>280 K</b>          | Cl4—Cd1—Cl2 <sup>iii</sup>                 | 83.15(4)   | Cl3—Cd1—Cl2 <sup>iii</sup>                 | 96.68(4)   |
|                       | Cl4 <sup>iii</sup> —Cd1—Cl2                | 83.15(4)   | Cl3 <sup>iii</sup> —Cd1—Cl2                | 96.68(4)   |
|                       | Cl4 <sup>iii</sup> —Cd1—Cl3                | 84.92(4)   | Cl4—Cd1—Cl3                                | 95.08(5)   |
|                       | Cl4—Cd1—Cl3 <sup>iii</sup>                 | 84.92(4)   | Cl4 <sup>iii</sup> —Cd1—Cl3 <sup>iii</sup> | 95.08(4)   |
|                       | Cl3—Cd1—Cl2                                | 83.31(4)   | Cl4 <sup>iii</sup> —Cd1—Cl2 <sup>iii</sup> | 96.85(4)   |
|                       | Cl3 <sup>iii</sup> —Cd1—Cl2 <sup>iii</sup> | 83.32(4)   | Cl4—Cd1—Cl2                                | 96.85(4)   |
|                       | Cd1 - Cl2 - Cd1 <sup>i</sup>               | 78.58(4)   | Cl2—Cd1—Cl2 <sup>iii</sup>                 | 180.0      |
|                       | Cd1 <sup>i</sup> - Cl3 - Cd1               | 78.82(4)   | Cl3—Cd1—Cl3 <sup>iii</sup>                 | 180.0      |
|                       | Cd1 - Cl4 - Cd1 <sup>ii</sup>              | 79.83(5)   | Cl4 <sup>iii</sup> —Cd1—Cl4                | 180.0      |
|                       | Cd1 <sup>i</sup> —Cd1—Cd1 <sup>ii</sup>    | 180.0      |                                            |            |
|                       | <b>Symmetry codes:</b>                     |            |                                            |            |
| i) 1-X, 1/2+Y, 2-Z;   |                                            |            |                                            |            |
| ii) 1-X, -1/2+Y, 2-Z; |                                            |            |                                            |            |
| iii) 1-X, 1-Y, 2-Z;   |                                            |            |                                            |            |
| iv) X, 3/2-Y, +Z      |                                            |            |                                            |            |
| <b>T (K)</b>          | Atom- Atom- Atom                           | Angles [°] | Atom- Atom- Atom                           | Angles [°] |
| <b>230 K</b>          | Cl3—Cd1—Cl4 <sup>ii</sup>                  | 84.19(9)   | Cl3—Cd1—Cl4                                | 95.81(9)   |
|                       | Cl3 <sup>ii</sup> —Cd1—Cl4                 | 84.19(9)   | Cl3 <sup>ii</sup> —Cd1—Cl4 <sup>ii</sup>   | 95.81(9)   |
|                       | Cl3—Cd1—Cl5                                | 85.23(10)  | Cl3—Cd1—Cl5 <sup>ii</sup>                  | 94.77(10)  |
|                       | Cl3 <sup>ii</sup> —Cd1—Cl5 <sup>ii</sup>   | 85.23(10)  | Cl3 <sup>ii</sup> —Cd1—Cl5                 | 94.77(10)  |
|                       | Cl4—Cd1—Cl5 <sup>ii</sup>                  | 83.28(9)   | Cl4—Cd1—Cl5                                | 96.72(9)   |
|                       | Cl4 <sup>ii</sup> —Cd1—Cl5                 | 83.28(9)   | Cl4 <sup>ii</sup> —Cd1—Cl5 <sup>ii</sup>   | 96.72(9)   |
|                       | Cl3 <sup>ii</sup> —Cd2—Cl5 <sup>ii</sup>   | 84.86(10)  | Cl3 <sup>ii</sup> —Cd2—Cl5 <sup>iii</sup>  | 95.14(10)  |
|                       | Cl3 <sup>iii</sup> —Cd2—Cl5 <sup>iii</sup> | 84.86(10)  | Cl3 <sup>iii</sup> —Cd2—Cl5 <sup>ii</sup>  | 95.14(10)  |
|                       | Cl4—Cd2—Cl3 <sup>ii</sup>                  | 83.86(9)   | Cl4—Cd2—Cl3 <sup>iii</sup>                 | 96.14(9)   |
|                       | Cl4 <sup>iv</sup> —Cd2—Cl3 <sup>iii</sup>  | 83.86(9)   | Cl4 <sup>iv</sup> —Cd2—Cl3 <sup>ii</sup>   | 96.14(9)   |
|                       | Cl4—Cd2—Cl5 <sup>ii</sup>                  | 83.40(9)   | Cl4—Cd2—Cl5 <sup>iii</sup>                 | 96.60(9)   |
|                       | Cl4 <sup>iv</sup> —Cd2—Cl5 <sup>iii</sup>  | 83.40(9)   | Cl4 <sup>iv</sup> —Cd2—Cl5 <sup>ii</sup>   | 96.60(9)   |
|                       | Cd2—Cd1—Cd2 <sup>i</sup>                   | 180.0      | Cd1 <sup>iii</sup> —Cd2—Cd1                | 180.0      |
|                       | Cl3 <sup>ii</sup> —Cd1—Cl3                 | 180.0      | Cl3 <sup>ii</sup> —Cd2—Cl3 <sup>iii</sup>  | 180.0(1)   |
|                       | Cl4 <sup>ii</sup> —Cd1—Cl4                 | 180.0      | Cl4—Cd2—Cl4 <sup>iv</sup>                  | 180.0(8)   |
|                       | Cl5—Cd1—Cl5 <sup>ii</sup>                  | 180.0      | Cl5 <sup>ii</sup> —Cd2—Cl5 <sup>iii</sup>  | 180.0      |
|                       | <b>Symmetry codes:</b>                     |            |                                            |            |
| i). X, Y, Z;          |                                            |            |                                            |            |
| ii). 1-X,-Y,1-Z;      |                                            |            |                                            |            |
| iii). -1+X, Y, Z;     |                                            |            |                                            |            |
| iv). -X, -Y, 1-Z      |                                            |            |                                            |            |

**Table S4.** Selected Bond Lengths [ $\text{\AA}$ ] for **MPCC** at 280 K and 230 K

| T (K)                  | Atom-Atom              | Bond length ( $\text{\AA}$ ) | Atom-Atom              | Bond length ( $\text{\AA}$ ) |
|------------------------|------------------------|------------------------------|------------------------|------------------------------|
| <b>280 K</b>           | Cd1—Cd1 <sup>i</sup>   | 3.35940(15)                  | Cl2—Cd1 <sup>ii</sup>  | 2.6525(12)                   |
|                        | Cd1—Cd1 <sup>ii</sup>  | 3.35940(15)                  | Cl3—Cd1 <sup>ii</sup>  | 2.6458 (12)                  |
|                        | Cd1—Cl2                | 2.6525(12)                   |                        |                              |
|                        | Cd1—Cl2 <sup>iii</sup> | 2.6525(12)                   |                        |                              |
|                        | Cd1—Cl3 <sup>iii</sup> | 2.6458(12)                   |                        |                              |
|                        | Cd1—Cl3                | 2.6458(12)                   |                        |                              |
|                        | Cd1—Cl4 <sup>iii</sup> | 2.6178(13)                   |                        |                              |
|                        | Cd1—Cl4                | 2.6178(13)                   |                        |                              |
| <b>Symmetry codes:</b> |                        |                              |                        |                              |
| i. 1-X, -1/2+Y, 2-Z;   |                        |                              |                        |                              |
| ii. 1-X, 1/2+Y, 2-Z;   |                        |                              |                        |                              |
| iii. 1-X, 1-Y, 2-Z;    |                        |                              |                        |                              |
| iv. X, 3/2-Y, +Z       |                        |                              |                        |                              |
| T (K)                  | Atom-Atom              | Bond length ( $\text{\AA}$ ) | Atom-Atom              | Bond length ( $\text{\AA}$ ) |
| <b>230 K</b>           | Cd1—Cl3 <sup>ii</sup>  | 2.616(3)                     | Cd2—Cl3 <sup>ii</sup>  | 2.637(3)                     |
|                        | Cd1—Cl3                | 2.616(3)                     | Cd2—Cl3 <sup>iii</sup> | 2.637(3)                     |
|                        | Cd1—Cl4                | 2.628(3)                     | Cd2—Cl4                | 2.624(3)                     |
|                        | Cd1—Cl4 <sup>ii</sup>  | 2.628(3)                     | Cd2—Cl4 <sup>iv</sup>  | 2.624(3)                     |
|                        | Cd1—Cl5 <sup>ii</sup>  | 2.666(3)                     | Cd2—Cl5 <sup>ii</sup>  | 2.663(3)                     |
|                        | Cd1—Cl5                | 2.666(3)                     | Cd2—Cl5 <sup>iii</sup> | 2.663(3)                     |
|                        | Cd1—Cd2                | 3.3438(2)                    | Cl3—Cd2 <sup>i</sup>   | 2.637(3)                     |
|                        | Cd1—Cd2 <sup>i</sup>   | 3.3438(2)                    | Cl5—Cd2 <sup>i</sup>   | 2.663(3)                     |
|                        |                        |                              | Cd2—Cd1 <sup>iii</sup> | 3.3437(2)                    |
| <b>Symmetry codes:</b> |                        |                              |                        |                              |
| i. X, Y, Z;            |                        |                              |                        |                              |
| ii. 1-X, -Y, 1-Z;      |                        |                              |                        |                              |
| iii. -1+X, Y, Z;       |                        |                              |                        |                              |
| iv. -X, -Y, 1-Z        |                        |                              |                        |                              |

**Table S5.** Hydrogen-Bond Geometry ( $\text{\AA}$ , degree) for the N—H $\cdots$ Cl at 280 K and 230 K in **MPCC**

|              | D—H $\cdots$ A     | H $\cdots$ A [ $\text{\AA}$ ] | D $\cdots$ A [ $\text{\AA}$ ] | D—H $\cdots$ A [ $^\circ$ ] |
|--------------|--------------------|-------------------------------|-------------------------------|-----------------------------|
| <b>280 K</b> | N1—H1 $\cdots$ Cl2 | 2.275                         | 3.176                         | 170.46                      |
|              | N2—H2 $\cdots$ Cl3 | 2.496                         | 3.397                         | 170.21                      |
| <b>230 K</b> | N3—H3 $\cdots$ Cl5 | 2.475                         | 3.357                         | 158.4                       |



### Calculation of ' $\Delta S$ ' and ' $N$ ' For MPCC:

According to Boltzmann equation:

$$\Delta S = nR \ln N$$

Where;

$\Delta S$  = entropy change, extracted from the  $C_p$  data,

$R$  = the universal gas constant,

$n$  = the number of guest particles per mole ( $n=1$ , here), and

$N$  = the number of possible orientations for the disordered system.

The  $\Delta S$  and  $N$  values on the heating process of **MPCC** are calculated as follows: <sup>S1</sup>

$$\Delta S = \int_{T_1}^{T_2} \frac{Q}{T} dT$$

$$\Delta S \cong \frac{\Delta H}{T_c}$$

$$\Delta S = \frac{3.4406 \text{ J g}^{-1} \times 304.91 \text{ g mol}^{-1}}{255.5 \text{ K}} ; \text{ where } 304.91 \text{ g mol}^{-1} \text{ is a formula weight of MPCC.}$$

$$\Delta S = \frac{1049.07 \text{ J mol}^{-1}}{255.5 \text{ K}}$$

$$\Delta S = 4.114 \text{ J mol}^{-1} \text{ K}^{-1}$$

$$\Delta S = R \ln N$$

$$N = e^{\left(\frac{\Delta S}{R}\right)}$$

$$N = e^{\left(\frac{4.114 \text{ J mol}^{-1} \text{ K}^{-1}}{8.314 \text{ J mol}^{-1} \text{ K}^{-1}}\right)}$$

$$N = 1.64$$

**Reference:**

S1. Y.-Z. Tang, Z.-F. Gu, J.-B. Xiong, J.-X. Gao, Y. Liu, B. Wang, Y.-H. Tan and Q. Xu, *Chem. Mater.*, 2016, **28**, 4476–4482.
